# Supplementary material for: Dynamics of Changes in the Gut Microbiota of Healthy Mice Fed with Lactic Acid Bacteria and Bifidobacteria
Source: MDPI journal article supplement (doi:10.3390/microorganisms10051020), 2022-05-12
Supplement: s1 [file s1]

## **Diet composition**

### **Crude Nutrients [%]**

Crude protein (N x 6.25) 23.0

Crude fat 6.1

Crude fibre 3.3

NDF 11.3

ADF 5.2

Crude ash 6.5

Starch 34.1

Sugar 5.1

N free extracts 49.8

### **Minerals [%]**

Calcium 1.00

Phosphorus 0.70

Ca/P 1.43:1

Sodium 0.23

Magnesium 0.22

Potassium 1.03

### **Fatty acids [%]**

C 12:0 -

C 14:0 0.01

C 16:0 0.68

C 18:0 0.22

C 20:0 0.03

C 16:1 0.04

C 18:1 1.47

C 18:2 3.23

C 18:3 0.37

### **Amino acids [%]**

Lysine 1.57

Methionine 0.54

Cystine 0.40

Met+Cys. 0.94

Threonine 0.89

Tryptophan 0.29

Arginine 1.50  
Histidine 0.61  
Valine 1.12  
Isoleucine 1.02  
Leucine 1.79  
Phenylalanine 1.12  
Phe+Tyr 1.91  
Glycine 1.05  
Glutamic acid 4.83  
Aspartic acid 2.42  
Proline 1.50  
Serine 1.26  
Alanine 1.08

**Vitamins per kg**

Vitamin A 25,000 IU  
Vitamin D 3 1,500 IU  
Vitamin E 135 mg  
Vitamin K (as MNB) 20 mg  
Thiamine (B<sub>1</sub>) 86 mg  
Riboflavin (B<sub>2</sub>) 33 mg  
Pyridoxine (B<sub>6</sub>) 32 mg  
Cobalamin (B<sub>12</sub>) 150 µg  
Nicotinic acid 140 mg  
Pantothenic acid 58 mg  
Folic acid 10 mg  
Biotin 690 µg  
Choline 1,400 mg

**Trace elements per kg**

Iron 180 mg  
Manganese 58 mg  
Zinc 86 mg  
Copper 15 mg  
Iodine 2.1 mg  
Selenium 0.3 mg
